# Supplementary material for: Cost-effectiveness analysis of vonoprazan versus proton pump inhibitors in the treatment of reflux esophagitis in China
Source: PubMed Central journal article supplement — Ann Transl Med. 2022 Apr;10(8):480. doi: 10.21037/atm-22-1722 (PMC9096411; doi:10.21037/atm-22-1722), 2022-04
Supplement: atm-10-08-480-supplementary.pdf [file atm-10-08-480-supplementary.pdf]

**Table S1** Literature Search Strategies in English for the SLR

| #   | Search Terms                                                                                                                                                                                                                                                                                                                                                                                                                                               |
|-----|------------------------------------------------------------------------------------------------------------------------------------------------------------------------------------------------------------------------------------------------------------------------------------------------------------------------------------------------------------------------------------------------------------------------------------------------------------|
| 1.  | "erosive esophagitis[Title/Abstract] OR "erosive oesophagitis"[Title/Abstract] OR "erosive gastroesophageal reflux disease "[Title/Abstract] OR "erosive reflux esophagitis"[Title/Abstract] OR " erosive gastro-oesophageal reflux disease"[Title/Abstract] OR "erosive gastroesophageal reflux disease"[Title/Abstract] OR "reflux oesophagitis"[Title/Abstract] OR "reflux esophagitis"[Title/Abstract] OR "EE"[Title/Abstract] OR "RE"[Title/Abstract] |
| 2.  | " proton pump inhibitors "[Title/Abstract] OR "PPI"[Title/Abstract]                                                                                                                                                                                                                                                                                                                                                                                        |
| 3.  | " potassium-competitive acid blockers"[Title/Abstract] OR " P-CAB "[Title/Abstract]                                                                                                                                                                                                                                                                                                                                                                        |
| 4.  | " vonoprazan "[Title/Abstract]                                                                                                                                                                                                                                                                                                                                                                                                                             |
| 5.  | " pantoprazole"[Title/Abstract]                                                                                                                                                                                                                                                                                                                                                                                                                            |
| 6.  | " esomeprazole"[Title/Abstract]                                                                                                                                                                                                                                                                                                                                                                                                                            |
| 7.  | " lansoprazole "[Title/Abstract]                                                                                                                                                                                                                                                                                                                                                                                                                           |
| 8.  | " omeprazole "[Title/Abstract]                                                                                                                                                                                                                                                                                                                                                                                                                             |
| 9.  | " rabeprazole"[Title/Abstract]                                                                                                                                                                                                                                                                                                                                                                                                                             |
| 10. | " llaprazole"[Title/Abstract]                                                                                                                                                                                                                                                                                                                                                                                                                              |
| 11. | #1 OR #2 OR #3 OR #4 OR #5 OR #6 OR #7 OR #8 OR #9 OR #10                                                                                                                                                                                                                                                                                                                                                                                                  |
| 12. | randomized controlled trial [pt]                                                                                                                                                                                                                                                                                                                                                                                                                           |
| 13. | controlled clinical trial [pt]                                                                                                                                                                                                                                                                                                                                                                                                                             |
| 14. | randomized [TIAB]                                                                                                                                                                                                                                                                                                                                                                                                                                          |
| 15. | randomised [TIAB]                                                                                                                                                                                                                                                                                                                                                                                                                                          |
| 16. | "random allocation" [TIAB]                                                                                                                                                                                                                                                                                                                                                                                                                                 |
| 17. | clinical trials as topic [mesh: noexp]                                                                                                                                                                                                                                                                                                                                                                                                                     |
| 18. | randomly [TIAB]                                                                                                                                                                                                                                                                                                                                                                                                                                            |
| 19. | trial [ti]                                                                                                                                                                                                                                                                                                                                                                                                                                                 |
| 20. | "double blind" OR "double blinded" OR "double masked"                                                                                                                                                                                                                                                                                                                                                                                                      |
| 21. | "single blind" OR "single blinded" OR "single masked"                                                                                                                                                                                                                                                                                                                                                                                                      |
| 22. | #12 OR #13 OR #14 OR #15 OR #16 OR #17 OR #18 OR #19 OR #20 OR #21                                                                                                                                                                                                                                                                                                                                                                                         |
| 23. | #1 AND #11 AND #22                                                                                                                                                                                                                                                                                                                                                                                                                                         |
| 24. | #23 Limits: Humans                                                                                                                                                                                                                                                                                                                                                                                                                                         |
| 25. | #24 Limits: Adult: 19+ Years                                                                                                                                                                                                                                                                                                                                                                                                                               |
| 26. | #25 Limits: English                                                                                                                                                                                                                                                                                                                                                                                                                                        |
| 27. | #27 Limits: Publication Date 1995-2019                                                                                                                                                                                                                                                                                                                                                                                                                     |

Abbreviations: SLR, systematic literature review; EE, erosive esophagitis; RE, reflux esophagitis; PPI, proton pump inhibitor; P-CAB, potassium-competitive acid blocker

**Table S2** PICOS criteria to assess studies for the SLR

| PICOS elements |                                                                                                                                                                                                                                                                                                                        |
|----------------|------------------------------------------------------------------------------------------------------------------------------------------------------------------------------------------------------------------------------------------------------------------------------------------------------------------------|
| Population     | Adult patients with RE diagnosed by endoscopic examination                                                                                                                                                                                                                                                             |
| Interventions  | <ul style="list-style-type: none"> <li>• VPZ monotherapy (standard dose in acute treatment phase and low dose in maintenance phase)</li> <li>• Any PPI monotherapy (standard dose in acute treatment phase and low dose in maintenance phase) approved by National Medical Products Administration in China</li> </ul> |
| Comparators    | Any PPI monotherapy (standard dose in acute treatment phase and low dose in maintenance phase) approved by National Medical Products Administration in China                                                                                                                                                           |
| Outcomes       | <ul style="list-style-type: none"> <li>• Healing rate at week 4 in treatment phase</li> <li>• Healing rate at week 8 in treatment phase</li> <li>• Relapse rate at week 24 in maintenance phase</li> </ul>                                                                                                             |
| Study design   | RCT                                                                                                                                                                                                                                                                                                                    |

Abbreviations: SLR, systematic literature review; RE, Reflux esophagitis; PPI, proton pump inhibitors; VPZ, Vonoprazan; RCT, randomized controlled trial.

**Table S3** Cost calculation for proton pump inhibitors (PPI) group drug cost

| Original PPI Brand                | The average tender price of each PPI in 2020 was collected from YAOZHI® database* |                          | Market shares were collected from a panel of nationwide hospital survey (n=12); The market share of original PPIs in <u>2019Q2</u> was used to calculate the weighted average price <sup>#</sup> |
|-----------------------------------|-----------------------------------------------------------------------------------|--------------------------|--------------------------------------------------------------------------------------------------------------------------------------------------------------------------------------------------|
|                                   | Price of Standard Dose (CNY)                                                      | Price of Half Dose (CNY) | Market share by Prescriptions                                                                                                                                                                    |
| Omeprazole (Losec)                | 8.71                                                                              | 5.06                     | 3.6%                                                                                                                                                                                             |
| Esomeprazole (Nexium)             | 15.00                                                                             | 9.01                     | 13.9%                                                                                                                                                                                            |
| Pantoprazole (Protonix)           | 9.62                                                                              | 4.81                     | 4.0%                                                                                                                                                                                             |
| Lansoprazole (Prevacid, Takepron) | 8.67                                                                              | 4.34                     | 2.2%                                                                                                                                                                                             |
| Rabeprazole (Pariet)              | 20.81                                                                             | 10.54                    | 11.0%                                                                                                                                                                                            |
| Ilaprazole                        | 27.06                                                                             | 13.53                    | 0.70%                                                                                                                                                                                            |

PPI group drug cost was calculated based on average tender prices of each PPI available in China weighted by corresponding market shares. Note: \*, average price of standard dose of  $PPI = \frac{Price\ of\ Standard\ Dose + 2 * Price\ of\ Half\ Dose}{2}$ . Each PPI has both standard dose and half dose. In clinical practice, PPI could be taken as 1 tablet with standard dose per day or 2 tablets with half dose per day. #, Market-share weighted average price of standard/half dose of  $PPI\ group = \frac{\sum Price\ of\ PPI_i * Market\ Share\ of\ PPI_i}{\sum Market\ Share\ of\ PPI_i}$ .

**Table S4** Cost of other healthcare resources in a treatment course (Interview results)

| Questionnaire                                | Answer                                                                                                                                                                                                                                                                                                                                                                                        |
|----------------------------------------------|-----------------------------------------------------------------------------------------------------------------------------------------------------------------------------------------------------------------------------------------------------------------------------------------------------------------------------------------------------------------------------------------------|
| 1 The frequency of outpatient visit and cost | <ul style="list-style-type: none"> <li>• The Initiation of acute treatment needs one outpatient visit and several follow-up visits every 2 weeks for drug prescription. During 6-month maintenance treatment, the outpatient visit should be made every 4 weeks.</li> <li>• The average cost of an outpatient visit is 7\$.</li> </ul>                                                        |
| 2 The frequency of lab test and cost         | <ul style="list-style-type: none"> <li>• Patients were required to take an endoscopy test in the first outpatient visit for diagnosis. For patients who were unhealed after 8-week treatment, esophageal manometry and 24-hour pH monitoring were needed.</li> <li>• The average cost of an endoscopy test is 84\$.</li> <li>• The average cost of 24-hour pH monitoring is 116\$.</li> </ul> |

Other medical expenses associate with RE treatment were collected via local clinical expert interviews (n=10). RE, reflux esophagitis.

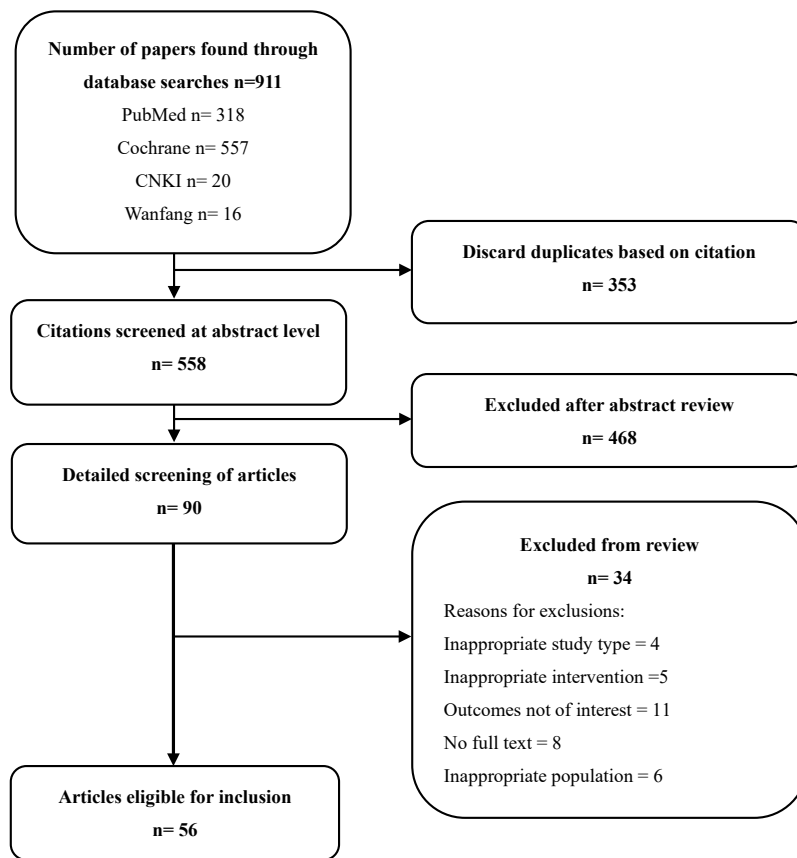

**Figure S1** Flowchart of study selection.

**Table S5** Baseline characteristics of included trials

| First author                 | Publication year | Study Sample (N) | Treatment        | Initial duration | Diagnosis level           | Evaluable population (N) | Age (year) |       | Male (%)    |
|------------------------------|------------------|------------------|------------------|------------------|---------------------------|--------------------------|------------|-------|-------------|
|                              |                  |                  |                  |                  |                           |                          | Mean       | SD    |             |
| Corinaldesi, R., et al. (1)  | 1995             | 241              | pantoprazole40mg | 8 weeks          | SM 2-3                    | 120                      | 50         | -     | 78 (65)     |
|                              |                  |                  | omeprazole20mg   | 8 weeks          | SM 2-3                    | 121                      | 52         | -     | 75 (62)     |
| Mössner, J., et al. (2)      | 1995             | 286              | pantoprazole40mg | 8 weeks          | SM 2-3                    | 191                      | 53         | -     | 133 (70)    |
|                              |                  |                  | omeprazole20mg   | 8 weeks          | SM 2-3                    | 95                       | 55         | -     | 66 (69)     |
| Castell, D. O., et al. (3)   | 1996             | 1284             | lansoprazole30mg | 8 weeks          | other 2-4                 | 422                      | -          | -     | -           |
|                              |                  |                  | omeprazole20mg   | 8 weeks          | other 2-4                 | 431                      | -          | -     | -           |
| Mee, A. S., et al. (4)       | 1996             | 604              | lansoprazole30mg | 8 weeks          | SM 1-4                    | 300                      | 53.4       | -     | 198 (66)    |
|                              |                  |                  | omeprazole20mg   | 8 weeks          | SM 1-4                    | 304                      | 52.4       | -     | 204 (67)    |
| Dekkers, C. P., et al. (5)   | 1999             | 202              | rabeprazole20mg  | 8 weeks          | HD 2-4                    | 100                      | 54         | 15.7  | 53 (53)     |
|                              |                  |                  | omeprazole20mg   | 8 weeks          | HD 2-4                    | 102                      | 52         | 15.56 | 73 (72)     |
| Delchier, J. C., et al. (6)  | 2000             | 310              | rabeprazole20mg  | 8 weeks          | HD 2-4                    | 104                      | 55         | 15.7  | 47 (45)     |
|                              |                  |                  | omeprazole20mg   | 8 weeks          | HD 2-4                    | 103                      | 53         | 15.1  | 40 (39)     |
| Kahrilas, P. J., et al. (7)  | 2000             | 1960             | esomeprazole40mg | 8 weeks          | LA A-D                    | 654                      | 44.8       | 13    | 384 (58.7)  |
|                              |                  |                  | omeprazole20mg   | 8 weeks          | LA A-D                    | 650                      | 46.5       | 13.5  | 399 (61.4)  |
| Richter, J. E., et al. (8)   | 2000             | 603              | pantoprazole40mg | 8 weeks          | HD 2-4                    | 173                      | 49.3       | 13.6  | 121 (69.9)  |
| Dupas, J. L., et al. (9)     | 2001             | 461              | pantoprazole40mg | 8 weeks          | SM 2-3                    | 225                      | 53         | 14.5  | 165 (73)    |
|                              |                  |                  | lansoprazole30mg | 8 weeks          | SM 2-3                    | 236                      | 55         | 14.7  | 178 (58)    |
| Richter, J. E., et al. (10)  | 2001             | 2425             | esomeprazole40mg | 8 weeks          | LA A-D                    | 1216                     | -          | -     | 772 (59.4)  |
|                              |                  |                  | omeprazole20mg   | 8 weeks          | LA A-D                    | 1209                     | -          | -     | 760 (62.9)  |
| Castell, D. O., et al. (11)  | 2002             | 5241             | esomeprazole40mg | 8 weeks          | LA A-D                    | 2624                     | 47         | 13    | 1504 (57.3) |
|                              |                  |                  | lansoprazole30mg | 8 weeks          | LA A-D                    | 2617                     | 47.4       | 13.1  | 1501 (57.4) |
| Howden, C. W., et al. (12)   | 2002             | 284              | lansoprazole30mg | 8 weeks          | other 2-4                 | 143                      | 47         | -     | 57 (82)     |
|                              |                  |                  | esomeprazole40mg | 8 weeks          | other 2-4                 | 141                      | 46         | -     | 54 (76)     |
| Körner, T., et al. (13)      | 2003             | 669              | pantoprazole40mg | 8 weeks          | SM 2-3                    | 337                      | 53.7       | 14.3  | 216 (64)    |
| Gillissen, A., et al.(14)    | 2004             | 227              | pantoprazole40mg | 8 weeks          | LA B-C                    | 113                      | 53         | 15    | 64 (57)     |
|                              |                  |                  | esomeprazole40mg | 8 weeks          | LA B-C                    | 114                      | 54         | 14    | 57 (50)     |
| Pace, F., et al.(15)         | 2005             | 560              | rabeprazole20mg  | 8 weeks          | SM 1-3                    | 283                      | 47.7       | 14.2  | 190 (67)    |
|                              |                  |                  | omeprazole20mg   | 8 weeks          | SM 1-3                    | 277                      | 47.1       | 14.9  | 184 (66)    |
| Fennerty, M. B., et al. (16) | 2005             | 999              | esomeprazole40mg | 8 weeks          | LA C-D                    | 498                      | 47.3       | 13.2  | 327 (65.7)  |
|                              |                  |                  | lansoprazole30mg | 8 weeks          | LA C-D                    | 501                      | 47.1       | 12.9  | 333 (66.5)  |
| Labenz, J., et al.(17)       | 2005             | 3151             | esomeprazole40mg | 8 weeks          | LA A-D                    | 1562                     | 50.6       | 14    | 969 (62)    |
|                              |                  |                  | pantoprazole40mg | 8 weeks          | LA A-D                    | 1589                     | 50.5       | 13.8  | 1102 (63.7) |
| Lightdale, C. J., et al.(18) | 2006             | 1175             | omeprazole20mg   | 8 weeks          | LA A-D                    | 588                      | 45.3       | 13    | 376 (63.9)  |
| Schmitt, C., et al.(19)      | 2006             | 1148             | esomeprazole40mg | 8 weeks          | LA A-D                    | 576                      | 47.1       | 13.3  | 346 (60.1)  |
|                              |                  |                  | omeprazole20mg   | 8 weeks          | LA A-D                    | 572                      | 46.2       | 13.6  | 335 (58.6)  |
| Vcev, A., et al.(20)         | 2006             | 180              | esomeprazole40mg | 8 weeks          | LA A-C                    | 90                       | 51.2       | 14.5  | 57 (63.3)   |
|                              |                  |                  | pantoprazole40mg | 8 weeks          | LA A-C                    | 90                       | 49.4       | 13.9  | 59 (65.6)   |
| Bardhan, K.D., et al.(21)    | 2007             | 581              | pantoprazole40mg | 8 weeks          | LA A-D                    | 288                      | 53         | 13    | 141 (49)    |
|                              |                  |                  | esomeprazole40mg | 8 weeks          | LA A-D                    | 293                      | 54         | 14    | 154 (53)    |
| Sharma, P., et al.(22)       | 2009             | 2038             | lansoprazole30mg | 8 weeks          | LA A-D                    | 690                      | 47.3       | 13.74 | 365 (52.9)  |
| Sharma,P., et al.(22)        | 2009             | 2054             | lansoprazole30mg | 8 weeks          | LA A-D                    | 673                      | 47.3       | 13.65 | 362 (53.8)  |
| Zheng, R.N., et al.(23)      | 2009             | 274              | omeprazole20mg   | 8 weeks          | LA A-D                    | 68                       | 57.9       | 14.1  | 33 (48.5)   |
|                              |                  |                  | lansoprazole30mg | 8 weeks          | LA A-D                    | 69                       | 58.1       | 13    | 35 (50.7)   |
|                              |                  |                  | pantoprazole40mg | 8 weeks          | LA A-D                    | 69                       | 57.8       | 13.2  | 34 (49.3)   |
|                              |                  |                  | esomeprazole40mg | 8 weeks          | LA A-D                    | 68                       | 57.4       | 12.8  | 33 (48.5)   |
| Ashida, K., et al.(24)       | 2015             | 733              | lansoprazole30mg | 8 weeks          | LA A-D                    | 140                      | 55.8       | 13.92 | 99 (70.7)   |
|                              |                  |                  | vonoprazan20mg   | 8 weeks          | LA A-D                    | 154                      | 58.3       | 13.86 | 115 (74.7)  |
| Ashida, K., et al(25)        | 2016             | 409              | vonoprazan20mg   | 8 weeks          | LA A-D                    | 207                      | 58.3       | 13.8  | 137 (66.2)  |
|                              |                  |                  | lansoprazole30mg | 8 weeks          | LA A-D                    | 202                      | 57.4       | 13.2  | 154 (76.2)  |
| Chen, M.H., et al(26)        | 2018             | 274              | vonoprazan20mg   | 8 weeks          | LA A-D                    | 143                      | 51.8       | 13.7  | 105 (73.4)  |
|                              |                  |                  | lansoprazole30mg | 8 weeks          | LA A-D                    | 131                      | 51.5       | 12.5  | 110 (82.7)  |
| Bardhan, K. D. et al(27)     | 1995             | 239              | lansoprazole30mg | 8 weeks          | Endoscopic appearance 0-3 | 77                       | 48         | -     | 50 (65)     |
| Mulder, C. J. et al(28)      | 1996             | 211              | lansoprazole30mg | 8 weeks          | SM 2-4                    | 106                      | 54.4       | 14.3  | 73 (70)     |
| Rensburg, C.V., et al (29)   | 1996             | 192              | pantoprazole40mg | 8 weeks          | SM 1-4                    | 97                       | 46         | -     | 57 (59)     |
| Jansen, J.B., et al(30)      | 1999             | 133              | lansoprazole30mg | 8 weeks          | SM 2-3                    | 68                       | 53.7       | 14.8  | 42 (61)     |
| Festen, H. P., et al(31)     | 1999             | 446              | omeprazole20mg   | 8 weeks          | SM 1-2                    | 222                      | 51.1       | 14.5  | 118 (53)    |
| Farley, A., et al(32)        | 2000             | 338              | rabeprazole20mg  | 8 weeks          | HD 0-5                    | 167                      | 51.4       | 14.9  | 118 (70)    |
| Kovacs, T. O. G., et al(33)  | 2002             | 221              | pantoprazole40mg | 8 weeks          | HD 0-5                    | 76                       | 49.4       | 13.8  | 52 (68)     |
| Kawano, S., et al(34)        | 2002             | 47               | omeprazole20mg   | 8 weeks          | LA A-D                    | -                        | 56         | 18    | 14 (58)     |
| Meneghelli, U. G., et al(35) | 2002             | 256              | pantoprazole40mg | 8 weeks          | SM 2-3                    | 128                      | 46.5       | -     | 80 (63)     |
| Cho, Y. K., et al(36)        | 2012             | 129              | pantoprazole40mg | 8 weeks          | LA A-C                    | 74                       | 50         | 13    | 61 (82)     |
| Song, F., et al.(37)         | 2012             | 180              | llaprazole10mg   | 8 weeks          | LA A-D                    | 60                       | -          | -     | -           |
|                              |                  |                  | esomeprazole40mg |                  |                           | 60                       |            |       |             |
| Xue, Y., et al.(38)          | 2016             | 318              | llaprazole10mg   | 8 weeks          | LA A-D                    | 107                      | 48.9       | 12.6  | 75 (70)     |
|                              |                  |                  | esomeprazole40mg |                  |                           | 105                      | 47.9       | 11.7  | 72 (69)     |
| Ashida, K., et al.(39)       | 2018             | 607              | Lansoprazole15mg | 24 W             | LA A-D                    | 196                      | 57.8       | 12.9  | 69.70%      |
|                              |                  |                  | Vonoprazan10mg   |                  |                           | 197                      | 55.2       | 13.8  | 79.20%      |
| Bate, C. M., et al.(40)      | 1995             | 193              | Omeprazole10mg   | 52 W             | LA A-D                    | 60                       | 53         | -     | 44%         |
| DeVault, K.R., et al.(41)    | 2006             | 1026             | Esomeprazole20mg | 24 W             | LA A-D                    | 501                      | 47.5       | -     | 59.30%      |
|                              |                  |                  | Lansoprazole15mg |                  |                           | 500                      | 47.9       | -     | 58.60%      |
| Robinson,M., et al.(42)      | 1996             | 115              | Lansoprazole15mg | 52W              | LA A-D                    | 59                       | -          | -     | -           |
| Labenz, J., et al.(43)       | 2005             | 3170             | Esomeprazole20mg | 24W              | LA A-D                    | 1377                     | 50.2       | 14.1  | 64.50%      |
|                              |                  |                  | Pantoprazole20mg |                  |                           | 1389                     | 50.7       | 13.8  | 61.60%      |
| Lauritsen, K., et al.(44)    | 2003             | 1224             | Esomeprazole20mg | 24W              | LA A-D                    | 615                      | 49.3       | -     | 63.10%      |
|                              |                  |                  | Lansoprazole15mg |                  |                           | 609                      | 49.2       | -     | 58.50%      |
| Richter, J. E., et al.(45)   | 2004             | 176              | Pantopraole20mg  | 52W              | LA A-D                    | 88                       | 48.99      | 13.35 | 69.30%      |
| Vakil, N. B., et al.(46)     | 2001             | 281              | Esomeprazole20mg | 24W              | LA A-D                    | 98                       | 45.2       | 12.8  | 59.00%      |
| Metz, D.C., et al.(47)       | 2003             | 274              | Pantoprazole20mg | 52W              | Grade 2-5                 | 91                       | 49.19      | 13.39 | 61.30%      |
| Gough, A. L., et al.(48)     | 1996             | 185              | Lansoprazole15mg | 52W              | -                         | 96                       | 57.8       | -     | 68.80%      |
| Kovacs,T.O., et al.(49)      | 2009             | 100              | Lansoprazole15mg | 52W              | HD 0-4                    | 100                      | 49.6       | 13.4  | 72%         |
| Escourrou, J., et al(50)     | 1999             | 396              | Pantoprazole20mg | 52W              | Grade 2-3                 | 203                      | 50         | -     | 72%         |
| Plein, K., et al.(51)        | 2000             | 433              | Pantoprazole20mg | 52W              | Grade 2-3                 | 221                      | -          | -     | -           |
| Johnson, D.A., et al.(52)    | 2001             | 82               | Esomeprazole20mg | 52W              | -                         | 82                       | -          | -     | -           |
| Goh, K.L., et al.(53)        | 2007             | 1303             | Pantoprazole20mg | 24W              | -                         | 636                      | 49         | 14.1  | 58.60%      |
|                              |                  |                  | Esomeprazole20mg |                  |                           | 667                      | 48.8       | 14.5  | 85%         |
| Caos, A., et al.(54)         | 2005             | 70               | Rabeprazole10mg  | 24W              | HD 0-2                    | 70                       | -          | -     | -           |
| Birbara, C., et al.(55)      | 2000             | 95               | Rabeprazole10mg  | 24W              | -                         | 95                       | -          | -     | -           |
| Bardhan, K.D., et al.(56)    | 1998             | 130              | Omeprazole10mg   | 24W              | -                         | 130                      | -          | -     | -           |

Abbreviations: SD, standard deviation; LA, Los Angeles grade ; HD, Hetzel–Dent scale ; SM, Savary–Miller scale

**Table S6** Main outcomes of included trials for treatment studies

| First author                          | Publication Year | Study Sample (N) | Treatment (n)      | Evaluable population (All), N | All patients Healing rates at week 4 | All patients Healing rates at week 8 | Evaluable population (Moderate-severe), N | Moderate-severe patients Healing rate at week 4 | Moderate-severe patients Healing rate at week 8 |
|---------------------------------------|------------------|------------------|--------------------|-------------------------------|--------------------------------------|--------------------------------------|-------------------------------------------|-------------------------------------------------|-------------------------------------------------|
| Corinaldesi, R., <i>et al.</i> (1)    | 1995             | 241              | pantoprazole 40 mg | 120                           | 81/120                               | 97/120                               | /                                         | /                                               | /                                               |
|                                       |                  |                  | omeprazole 20 mg   | 121                           | 83/121                               | 96/121                               | /                                         | /                                               | /                                               |
| MöSsner, J., <i>et al.</i> (2)        | 1995             | 286              | pantoprazole 40 mg | 191                           | 126/191                              | 153/191                              | /                                         | /                                               | /                                               |
|                                       |                  |                  | omeprazole 20 mg   | 95                            | 67/95                                | 81/95                                | /                                         | /                                               | /                                               |
| Castell, D. O., <i>et al.</i> (3)     | 1996             | 1284             | lansoprazole 30 mg | 422                           | 352/422                              | 380/422                              | /                                         | /                                               | /                                               |
|                                       |                  |                  | omeprazole 20 mg   | 431                           | 353/431                              | 391/431                              | /                                         | /                                               | /                                               |
| Mee, A. S., <i>et al.</i> (4)         | 1996             | 604              | lansoprazole 30 mg | 300                           | 186/300                              | 226/300                              | 40                                        | 18/40                                           | 26/40                                           |
|                                       |                  |                  | omeprazole 20 mg   | 304                           | 172/304                              | 216/304                              | 42                                        | 24/42                                           | 25/42                                           |
| Dekkers, C. P., <i>et al.</i> (5)     | 1999             | 202              | rabeprazole 20 mg  | 100                           | 81/100                               | 92/100                               | /                                         | /                                               | /                                               |
|                                       |                  |                  | omeprazole 20 mg   | 102                           | 83/102                               | 96/102                               | /                                         | /                                               | /                                               |
| Delchier, J. C., <i>et al.</i> (6)    | 2000             | 310              | rabeprazole 20 mg  | 104                           | 92/104                               | 95/104                               | /                                         | /                                               | /                                               |
|                                       |                  |                  | omeprazole 20 mg   | 103                           | 94/103                               | 97/103                               | /                                         | /                                               | /                                               |
| Kahrilas, P. J., <i>et al.</i> (7)    | 2000             | 1960             | esomeprazole 40 mg | 654                           | 496/654                              | 615/654                              | /                                         | /                                               | /                                               |
|                                       |                  |                  | omeprazole 20 mg   | 650                           | 411/650                              | 565/650                              | /                                         | /                                               | /                                               |
| Richter, J. E. <i>et al.</i> (8)      | 2000             | 603              | pantoprazole 40 mg | 173                           | 125/173                              | 152/173                              | /                                         | /                                               | /                                               |
| Dupas, J. L., <i>et al.</i> (9)       | 2001             | 461              | pantoprazole 40 mg | 225                           | 184/225                              | 203/225                              | /                                         | /                                               | /                                               |
|                                       |                  |                  | lansoprazole 30 mg | 236                           | 189/236                              | 201/236                              | /                                         | /                                               | /                                               |
| Richter, J. E., <i>et al.</i> (10)    | 2001             | 2425             | esomeprazole 40 mg | 1216                          | 993/1216                             | 1139/1216                            | /                                         | /                                               | /                                               |
|                                       |                  |                  | omeprazole 20 mg   | 1209                          | 831/1209                             | 1018/1209                            | /                                         | /                                               | /                                               |
| Castell, D. O., <i>et al.</i> (11)    | 2002             | 5241             | esomeprazole 40 mg | 2624                          | 2083/2624                            | 2430/2624                            | /                                         | /                                               | /                                               |
|                                       |                  |                  | lansoprazole 30 mg | 2617                          | 1965/2617                            | 2324/2617                            | /                                         | /                                               | /                                               |
| Howden, C. W., <i>et al.</i> (12)     | 2002             | 284              | lansoprazole 30 mg | 143                           | 107/143                              | 127/143                              | 52                                        | /                                               | 48/52                                           |
|                                       |                  |                  | esomeprazole 40 mg | 141                           | 108/141                              | 123/141                              | 57                                        | /57                                             | 47/57                                           |
| Körner, T., <i>et al.</i> (13)        | 2003             | 669              | pantoprazole 40 mg | 337                           | 220/337                              | 284/337                              | /                                         | /                                               | /                                               |
| Gillessen, A., <i>et al.</i> (14)     | 2004             | 227              | pantoprazole 40 mg | 113                           | 55/113                               | 94/113                               | /                                         | /                                               | /                                               |
|                                       |                  |                  | esomeprazole 40 mg | 114                           | 68/114                               | 92/114                               | /                                         | /                                               | /                                               |
| Pace, F., <i>et al.</i> (15)          | 2005             | 560              | rabeprazole 20 mg  | 283                           | 212/283                              | 228/283                              | /                                         | /                                               | /                                               |
|                                       |                  |                  | omeprazole 20 mg   | 277                           | 213/277                              | 231/277                              | /                                         | /                                               | /                                               |
| Fennerty, M. B., <i>et al.</i> (16)   | 2005             | 999              | esomeprazole 40 mg | 498                           | 278/498                              | 386/498                              | 498                                       | 278/498                                         | 386/498                                         |
|                                       |                  |                  | lansoprazole 30 mg | 501                           | /                                    | /                                    | 501                                       | 238/501                                         | 367/501                                         |
| Labenz, J., <i>et al.</i> (17)        | 2005             | 3151             | esomeprazole 40 mg | 1562                          | 1231/1562                            | 1493/1562                            | 374                                       | 259/374                                         | 340/374                                         |
|                                       |                  |                  | pantoprazole 40 mg | 1589                          | 1157/1589                            | 1463/1589                            | 395                                       | 219/395                                         | 333/395                                         |
| Lightdale, C. J., <i>et al.</i> (18)  | 2006             | 1175             | omeprazole 20 mg   | 588                           | /                                    | 484/588                              | 154                                       | /154                                            | 110/154                                         |
| Schmitt, C., <i>et al.</i> (19)       | 2006             | 1148             | esomeprazole 40 mg | 576                           | 393/576                              | 501/576                              | 189                                       | 115/189                                         | 167/189                                         |
|                                       |                  |                  | omeprazole 20 mg   | 572                           | 379/572                              | 491/572                              | 169                                       | 81/169                                          | 131/169                                         |
| Vcev, A., <i>et al.</i> (20)          | 2006             | 180              | esomeprazole 40 mg | 90                            | 70/90                                | 83/90                                | 13                                        | 8/13                                            | 10/13                                           |
|                                       |                  |                  | pantoprazole 40 mg | 90                            | 65/90                                | 82/90                                | 16                                        | 8/16                                            | 12/16                                           |
| Bardhan, K.D., <i>et al.</i> (21)     | 2007             | 581              | pantoprazole 40 mg | 288                           | 199/288                              | 248/288                              | /                                         | /                                               | /                                               |
|                                       |                  |                  | esomeprazole 40 mg | 293                           | 202/293                              | 243/293                              | /                                         | /                                               | /                                               |
| Sharma, P., <i>et al.</i> (22)        | 2009             | 2038             | lansoprazole 30 mg | 690                           | /                                    | 518/690                              | 210                                       | /210                                            | 130/210                                         |
| Sharma, P., <i>et al.</i> (22)        | 2009             | 2054             | lansoprazole 30 mg | 673                           | /                                    | 548/673                              | 194                                       | /194                                            | 150/194                                         |
| Zheng, R.N., <i>et al.</i> (23)       | 2009             | 274              | omeprazole 20 mg   | 68                            | /                                    | 57/68                                | /                                         | /                                               | /                                               |
|                                       |                  |                  | lansoprazole 30 mg | 69                            | /                                    | 60/69                                | /                                         | /                                               | /                                               |
|                                       |                  |                  | pantoprazole 40 mg | 69                            | /                                    | 61/69                                | /                                         | /                                               | /                                               |
|                                       |                  |                  | esomeprazole 40 mg | 68                            | /                                    | 62/68                                | /                                         | /                                               | /                                               |
| Ashida, K., <i>et al.</i> (24)        | 2015             | 733              | lansoprazole 30 mg | 140                           | 123/140                              | 126/140                              | 47                                        | 40/47                                           | 43/47                                           |
|                                       |                  |                  | vonoprazan20 mg    | 154                           | 136/154                              | 139/154                              | 51                                        | 50/51                                           | 50/51                                           |
| Ashida, K., <i>et al.</i> (25)        | 2016             | 409              | vonoprazan20 mg    | 207                           | 198/207                              | 203/207                              | 75                                        | 72/75                                           | 74/75                                           |
|                                       |                  |                  | lansoprazole 30 mg | 202                           | 184/202                              | 190/202                              | 73                                        | 58/73                                           | 63/73                                           |
| Chen, M.H., <i>et al.</i> (26)        | 2018             | 274              | vonoprazan20 mg    | 143                           | 120/143                              | 131/143                              | 54                                        | 38/54                                           | 45/54                                           |
|                                       |                  |                  | lansoprazole 30 mg | 131                           | 109/131                              | 116/131                              | 46                                        | 32/46                                           | 36/46                                           |
| Bardhan, K. D., <i>et al.</i> (27)    | 1995             | 239              | lansoprazole 30 mg | 77                            | 63/77                                | 70/77                                | 58                                        | 45/58                                           | 51/58                                           |
| Mulder, C. J., <i>et al.</i> (28)     | 1996             | 211              | lansoprazole 30 mg | 106                           | 91/106                               | 99/106                               | 29                                        | 24/29                                           | 27/29                                           |
| Rensburg, C.V., <i>et al.</i> (29)    | 1996             | 192              | pantoprazole 40 mg | 97                            | 67/97                                | 82/97                                | /                                         | /                                               | /                                               |
| Jansen, J.B., <i>et al.</i> (30)      | 1999             | 133              | lansoprazole 30 mg | 68                            | 54/68                                | 62/68                                | /                                         | /                                               | /                                               |
| Festen, H. P., <i>et al.</i> (31)     | 1999             | 446              | omeprazole 20 mg   | 222                           | 135/222                              | 165/222                              | /                                         | /                                               | /                                               |
| Farley, A., <i>et al.</i> (32)        | 2000             | 338              | rabeprazole 20 mg  | 167                           | 98/167                               | 146/167                              | /                                         | /                                               | /                                               |
| Kovacs, T. O. G., <i>et al.</i> (33)  | 2002             | 221              | pantoprazole 40 mg | 76                            | 48/76                                | 58/76                                | 30                                        | 11/30                                           | 16/30                                           |
| Kawano, S., <i>et al.</i> (34)        | 2002             | 47               | omeprazole 20 mg   | /                             | /                                    | /                                    | 7                                         | /                                               | 4/7                                             |
| Meneghelli, U. G., <i>et al.</i> (35) | 2002             | 256              | pantoprazole 40 mg | 128                           | 69/128                               | 96/128                               | 24                                        | 12/24                                           | 17/24                                           |
| Cho, Y. K., <i>et al.</i> (36)        | 2012             | 129              | pantoprazole 40 mg | 74                            | 52/74                                | 60/74                                | /                                         | /                                               | /                                               |
| Song, F., <i>et al.</i> (37)          | 2012             | 180              | lansoprazole 10 mg | 60                            | 51/60                                | 54/60                                | /                                         | /                                               | /                                               |
|                                       |                  |                  | esomeprazole 40 mg | 60                            | 52/60                                | 55/60                                | /                                         | /                                               | /                                               |
| Xue, Y., <i>et al.</i> (38)           | 2016             | 318              | lansoprazole 10 mg | 107                           | 87/107                               | 95/107                               | /                                         | /                                               | /                                               |
|                                       |                  |                  | esomeprazole 40 mg | 105                           | 75/105                               | 89/105                               | /                                         | /                                               | /                                               |

**Table S7** Main outcomes of included trials for maintenance studies

| First author                       | Publication year | Study Sample (N) | Treatment (n)      | Evaluable population (All), N | All patients Remission rate* at week 24 | Evaluable population (Moderate-severe), N | Moderate-severe patients Remission rate* at week 24 |
|------------------------------------|------------------|------------------|--------------------|-------------------------------|-----------------------------------------|-------------------------------------------|-----------------------------------------------------|
| Ashida, K., <i>et al.</i> (39)     | 2018             | 607              | Lansoprazole 15 mg | 196                           | 172/196                                 | 41                                        | 25/41                                               |
|                                    |                  |                  | Vonoprazan 10 mg   | 197                           | 192/197                                 | 40                                        | 33/38                                               |
| Bate, C. M., <i>et al.</i> (40)    | 1995             | 193              | Omeprazole 10 mg   | 60                            | /                                       | /                                         | /                                                   |
| DeVault, K.R., <i>et al.</i> (41)  | 2006             | 1026             | Esomeprazole 20 mg | 501                           | 432/501                                 | 121                                       | 96/121                                              |
|                                    |                  |                  | Lansoprazole 15 mg | 500                           | 388/500                                 | 131                                       | 91/131                                              |
| Robinson, M., <i>et al.</i> (42)   | 1996             | 115              | Lansoprazole 15 mg | 59                            | 48/59                                   |                                           |                                                     |
| Labenz, J., <i>et al.</i> (43)     | 2005             | 3170             | Esomeprazole 20 mg | 1377                          | 1198/1377                               | 323                                       | 263/323                                             |
|                                    |                  |                  | Pantoprazole 20 mg | 1389                          | 1040/1389                               | 317                                       | 208/317                                             |
| Lauritsen, K., <i>et al.</i> (44)  | 2003             | 1224             | Esomeprazole 20 mg | 615                           | 510/615                                 | 114                                       | 86/114                                              |
|                                    |                  |                  | Lansoprazole 15 mg | 609                           | 451/609                                 | 102                                       | 60/102                                              |
| Richter, J. E., <i>et al.</i> (45) | 2004             | 176              | Pantoprazole 20 mg | 88                            | /                                       | /                                         | /                                                   |
| Vakil, N. B., <i>et al.</i> (46)   | 2001             | 281              | Esomeprazole 20 mg | 98                            | 77/98                                   | /                                         | /                                                   |
| Metz, D.C., <i>et al.</i> (47)     | 2003             | 274              | Pantoprazole 20 mg | 91                            | /                                       | 23                                        | 16/23                                               |
| Gough, A. L., <i>et al.</i> (48)   | 1996             | 185              | Lansoprazole 15 mg | 96                            | 78/96                                   | /                                         | /                                                   |
| Kovacs, T.O., <i>et al.</i> (49)   | 2009             | 100              | Lansoprazole 15 mg | 100                           | /                                       | /                                         | /                                                   |
| Escourrou, J., <i>et al.</i> (50)  | 1999             | 396              | Pantoprazole 20 mg | 203                           | 171/203                                 | /                                         | /                                                   |
| Plein, K., <i>et al.</i> (51)      | 2000             | 433              | Pantoprazole 20 mg | 221                           | 177/221                                 | /                                         | /                                                   |
| Johnson, D.A., <i>et al.</i> (52)  | 2001             | 82               | Esomeprazole 20 mg | 82                            | 76/82                                   | /                                         | /                                                   |
| Goh, K.L., <i>et al.</i> (53)      | 2007             | 1303             | Pantoprazole 20 mg | 636                           | 534/636                                 | /                                         | /                                                   |
|                                    |                  |                  | Esomeprazole 20 mg | 667                           | 567/667                                 | /                                         | /                                                   |
| Caos, A., <i>et al.</i> (54)       | 2005             | 70               | Rabeprazole 10 mg  | 70                            | 54/70                                   | /                                         | /                                                   |
| Birbara, C., <i>et al.</i> (55)    | 2000             | 95               | Rabeprazole 10 mg  | 95                            | 81/95                                   | /                                         | /                                                   |
| Bardhan, K.D., <i>et al.</i> (56)  | 1998             | 130              | Omeprazole 10 mg   | 130                           | 107/130                                 | /                                         | /                                                   |

\*Remission rate is the proportion of patients who remained healed during the 6 months. This is the widely reported endpoint in majority clinical trials' \*Relapse rate = 1 - remission rate

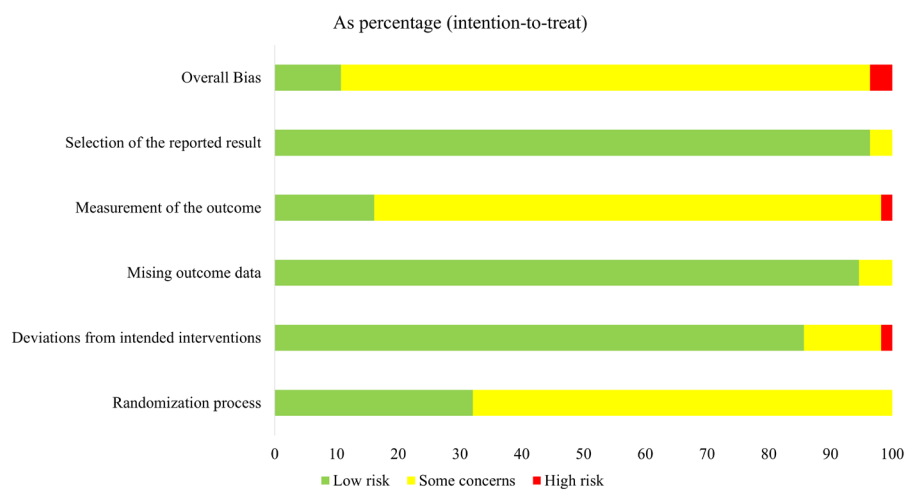

**Figure S2** Risk of bias assessment for included clinical trials: overall judgements at each level per domain.

|                  | Randomization process | Deviations from intended interventions | Missing outcome data | Measurement of the outcome | Selection of the reported result | Overall |
|------------------|-----------------------|----------------------------------------|----------------------|----------------------------|----------------------------------|---------|
| Corinaldesi_1995 | ?                     | ?                                      | +                    | ?                          | ?                                | !       |
| Mössner_1995     | ?                     | +                                      | ?                    | ?                          | +                                | !       |
| Castell_1996     | ?                     | +                                      | +                    | ?                          | +                                | !       |
| Mee_1996         | +                     | ?                                      | +                    | ?                          | +                                | !       |
| Dekkers_1999     | ?                     | +                                      | +                    | +                          | +                                | !       |
| Delchier_2000    | ?                     | +                                      | +                    | ?                          | +                                | !       |
| Kahrilas_2000    | +                     | +                                      | +                    | ?                          | +                                | !       |
| Richter_2000     | ?                     | +                                      | +                    | ?                          | +                                | +       |
| Dupas_2001       | ?                     | +                                      | +                    | ?                          | +                                | !       |
| Richter_2001     | +                     | +                                      | +                    | ?                          | +                                | !       |
| Castell_2002     | +                     | +                                      | +                    | ?                          | +                                | !       |
| Howden_2002      | ?                     | +                                      | +                    | +                          | +                                | !       |
| Körner_2003      | ?                     | +                                      | +                    | ?                          | +                                | !       |
| Gillessen_2004   | ?                     | +                                      | +                    | ?                          | +                                | !       |
| Pace_2005        | +                     | +                                      | +                    | ?                          | +                                | !       |
| Fennerty_2005    | +                     | +                                      | +                    | ?                          | +                                | !       |
| Labenz_2005      | ?                     | +                                      | +                    | ?                          | +                                | !       |
| Lightdale_2006   | +                     | +                                      | +                    | ?                          | +                                | !       |
| Schmitt_2006     | +                     | +                                      | +                    | ?                          | +                                | !       |
| Vcev_2006        | ?                     | ?                                      | +                    | ?                          | +                                | ?       |
| Bardhan_2007     | +                     | +                                      | +                    | ?                          | +                                | !       |
| Sharma_2009      | ?                     | +                                      | +                    | ?                          | +                                | +       |
| Zheng_2009       | +                     | +                                      | +                    | ?                          | +                                | !       |
| Ashida_2015      | ?                     | +                                      | +                    | ?                          | +                                | !       |
| Ashida_2016      | +                     | +                                      | +                    | ?                          | +                                | !       |
| Chen_2018        | ?                     | +                                      | +                    | ?                          | +                                | !       |
| Bardhan_1995     | ?                     | +                                      | +                    | ?                          | +                                | !       |
| Mulder_1996      | ?                     | +                                      | +                    | ?                          | +                                | !       |
| Rensburg_1996    | ?                     | +                                      | +                    | ?                          | +                                | !       |
| Jansen_1999      | ?                     | +                                      | +                    | ?                          | +                                | !       |
| Festen_1999      | ?                     | ?                                      | +                    | ?                          | +                                | !       |
| Farley_2000      | ?                     | +                                      | +                    | +                          | +                                | +       |
| Kovacs_2002      | ?                     | +                                      | +                    | +                          | +                                | !       |
| Kawano_2002      | ?                     | ?                                      | +                    | ?                          | +                                | !       |
| Meneghelli_2002  | ?                     | +                                      | +                    | ?                          | +                                | !       |
| Cho_2012         | ?                     | ?                                      | ?                    | ?                          | ?                                | !       |
| Song_2012        | ?                     | +                                      | +                    | ?                          | +                                | !       |
| Xue_2016         | ?                     | +                                      | +                    | ?                          | +                                | !       |
| Ashida_2018      | +                     | +                                      | +                    | +                          | +                                | +       |
| Bate_1995        | ?                     | +                                      | +                    | ?                          | +                                | !       |
| DeVault_2006     | +                     | ?                                      | +                    | +                          | +                                | ?       |
| Robinson_1996    | ?                     | ?                                      | +                    | +                          | +                                | !       |
| Labenz_2005      | ?                     | +                                      | +                    | ?                          | +                                | !       |
| Lauritsen_2003   | ?                     | +                                      | +                    | ?                          | +                                | !       |
| Richter_2004     | +                     | +                                      | +                    | ?                          | +                                | !       |
| Vakil_2001       | +                     | +                                      | +                    | +                          | +                                | +       |
| Metz_2003        | ?                     | +                                      | +                    | ?                          | +                                | !       |
| Gough_1996       | +                     | +                                      | +                    | ?                          | +                                | !       |
| Kovacs_2009      | ?                     | +                                      | +                    | ?                          | +                                | !       |
| Escourrou_1999   | ?                     | +                                      | ?                    | ?                          | +                                | !       |
| Plein_2000       | ?                     | +                                      | +                    | ?                          | +                                | !       |
| Johnson_2001     | +                     | +                                      | +                    | +                          | +                                | +       |
| Goh_2007         | ?                     | +                                      | +                    | ?                          | +                                | !       |
| Caos_2000        | ?                     | +                                      | +                    | ?                          | +                                | !       |
| Birbara_2000     | ?                     | +                                      | +                    | ?                          | +                                | !       |
| Bardhan_1998     | +                     | +                                      | +                    | ?                          | +                                | !       |

**Figure S3** Risk of bias assessment for included clinical trials: judgements at each level per domain, study-by-study.



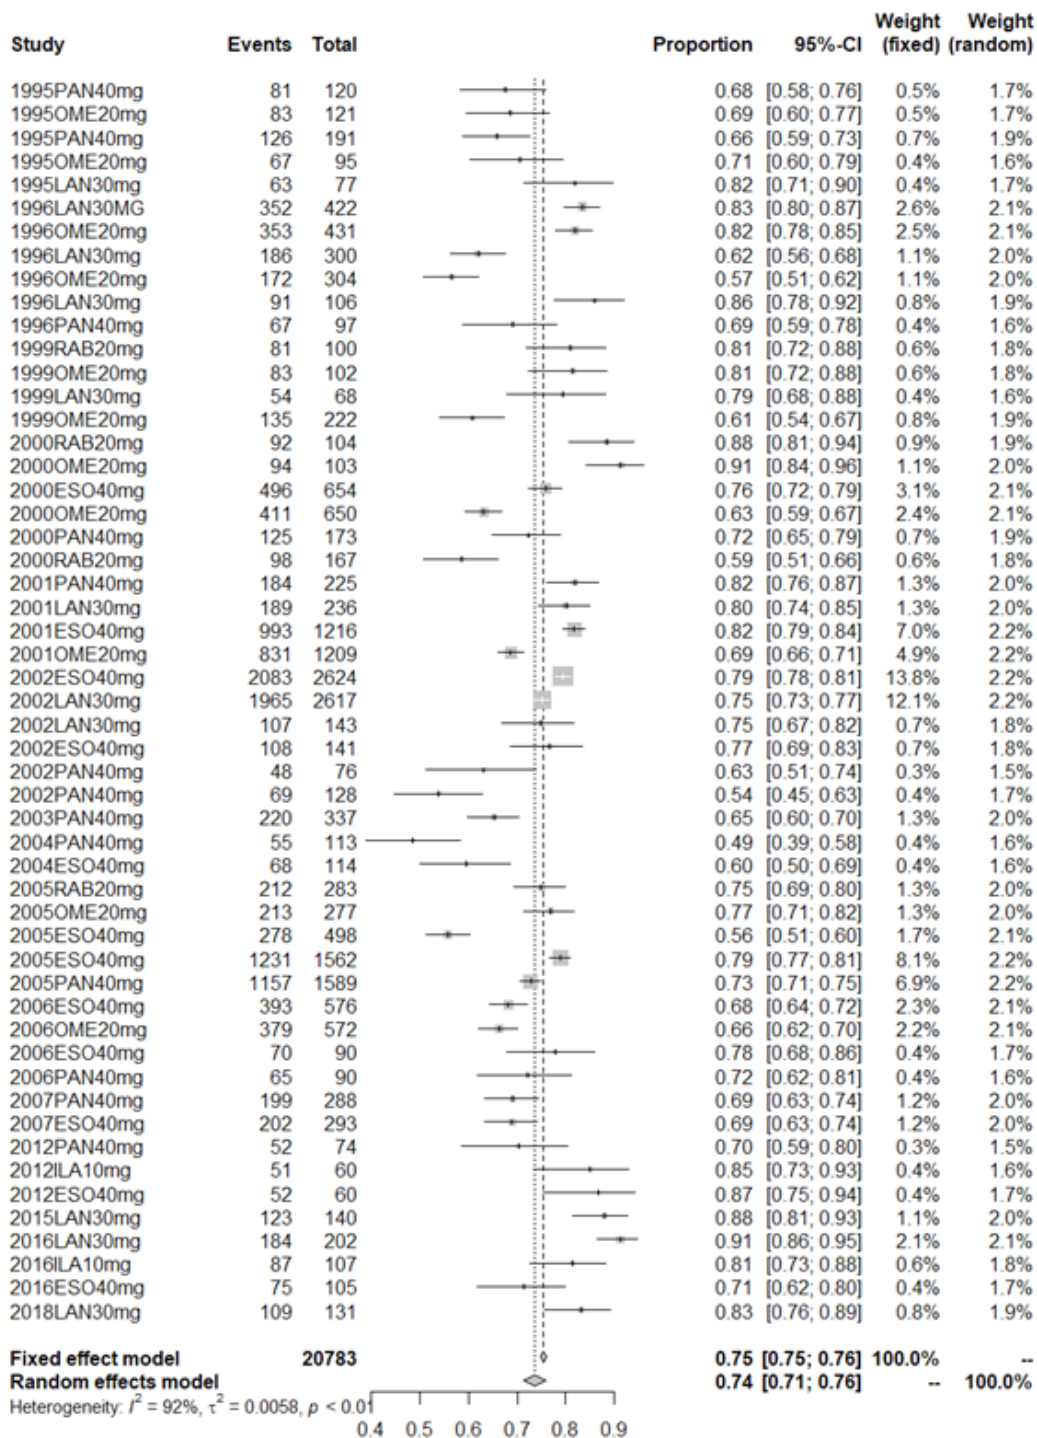

Figure S4 Meta-analysis results – Healing rate of PPI group at week 4 for all patients.

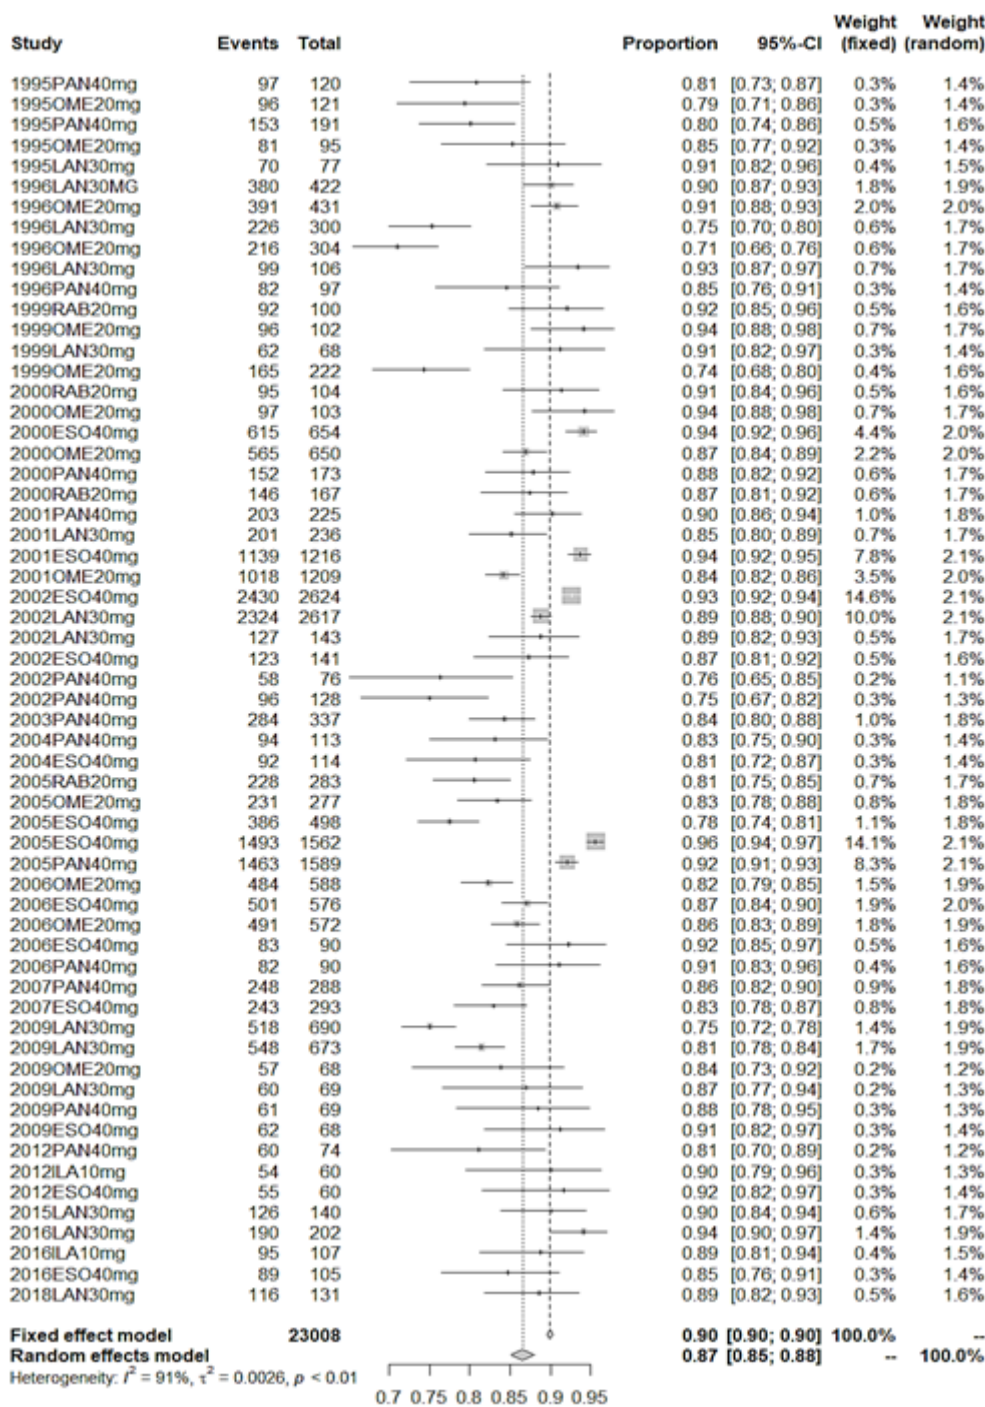

Figure S5 Meta-analysis results – Healing rate of PPI group at week 8 for all patients.

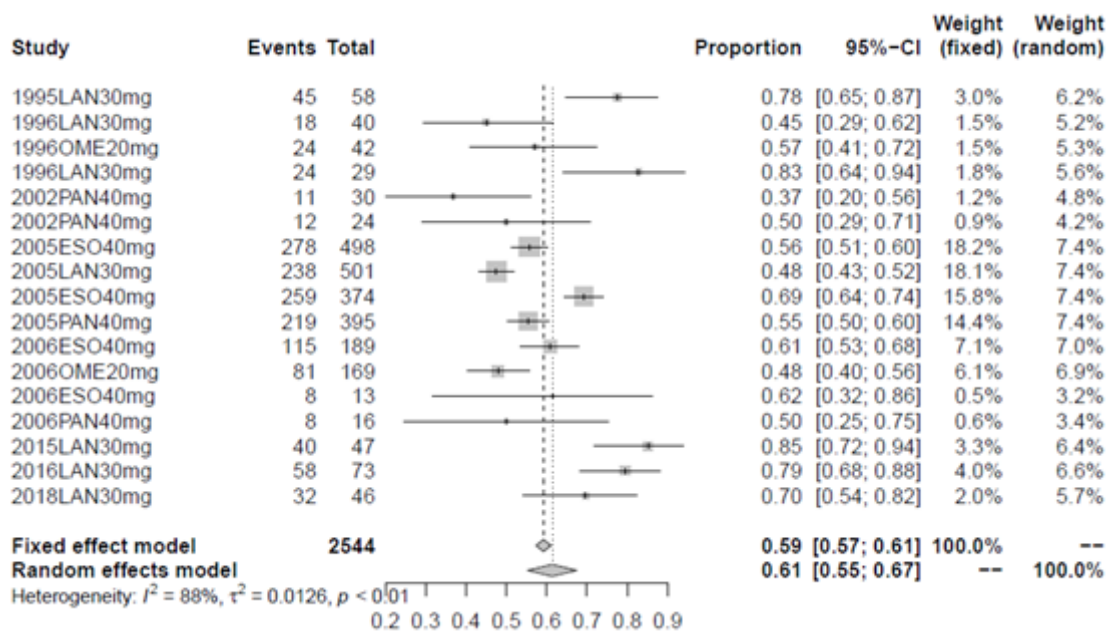

Figure S6 Meta-analysis results – Healing rate of PPI group at week 4 for moderate-to-severe patients.

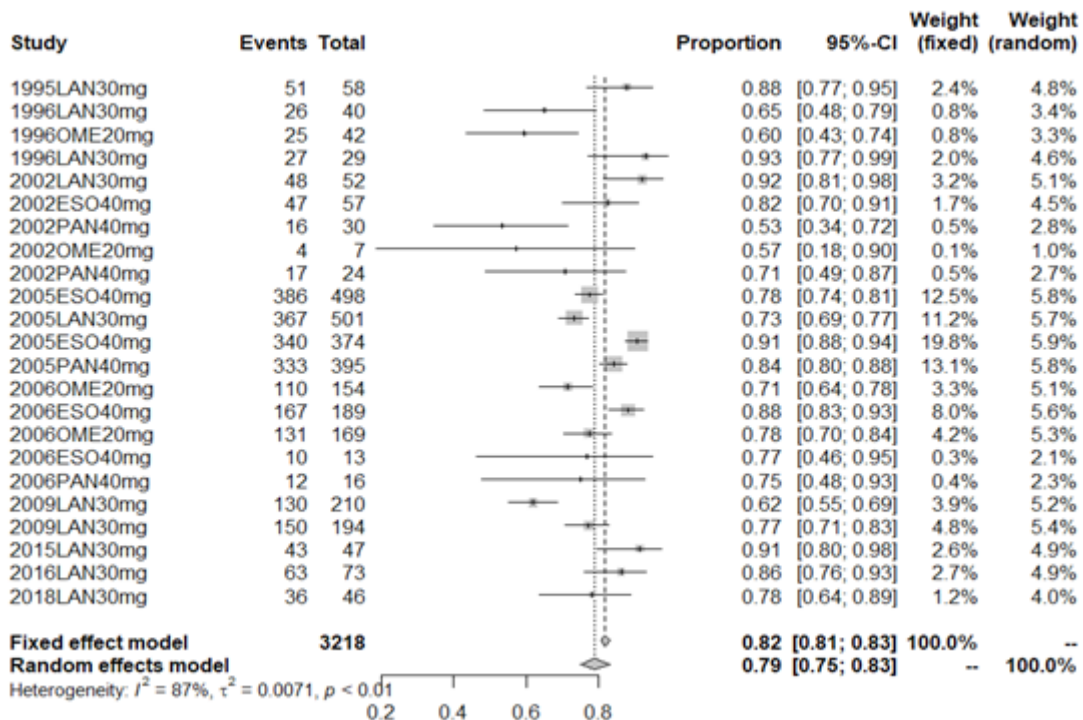

Figure S7 Meta-analysis results – Healing rate of PPI group at week 8 for moderate-to-severe patients.

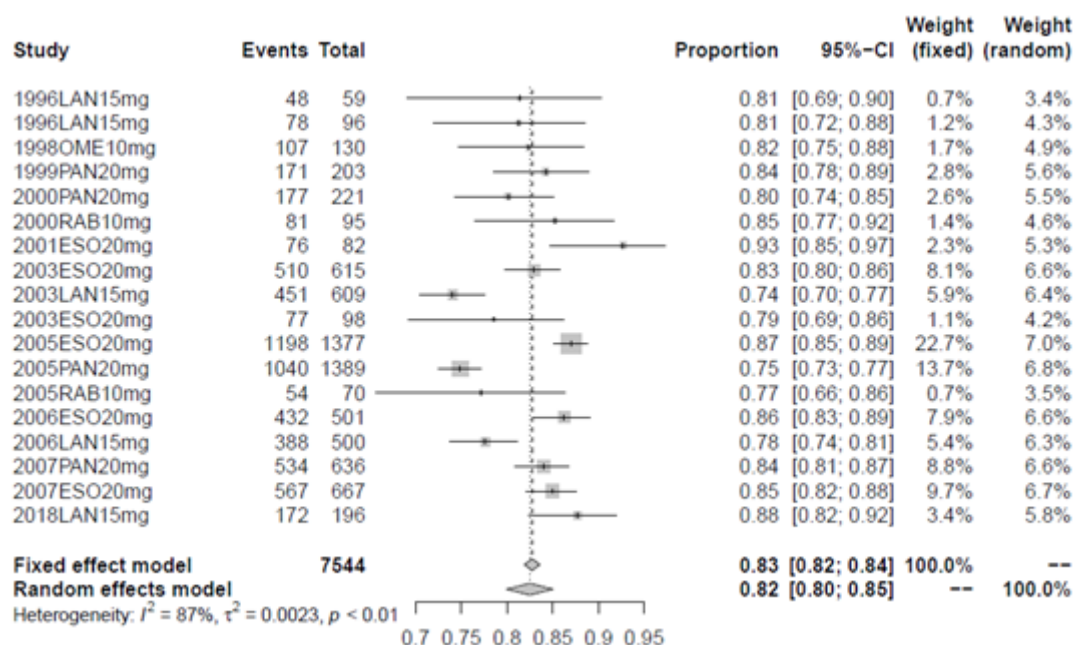

Figure S8 Meta-analysis results – Remission rate of PPI group at week 24 for all patients.

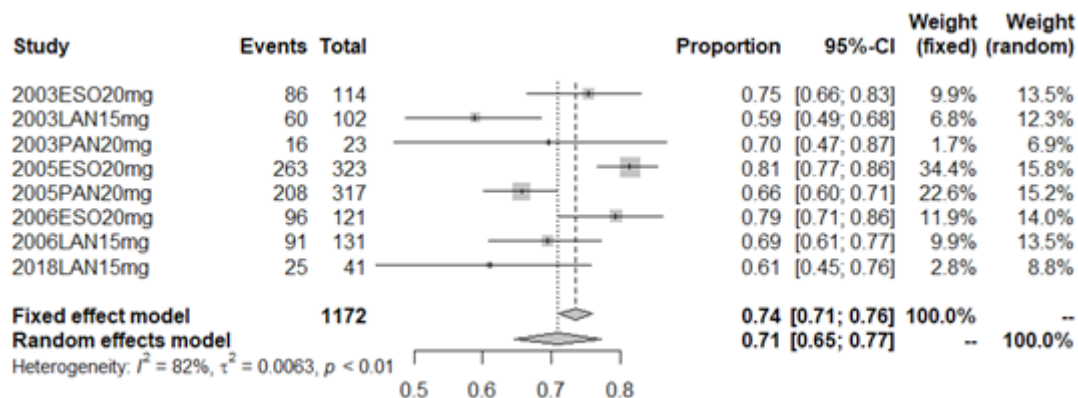

Figure S9 Meta-analysis results – Remission rate of PPI group at week 24 for moderate-to-severe patients.

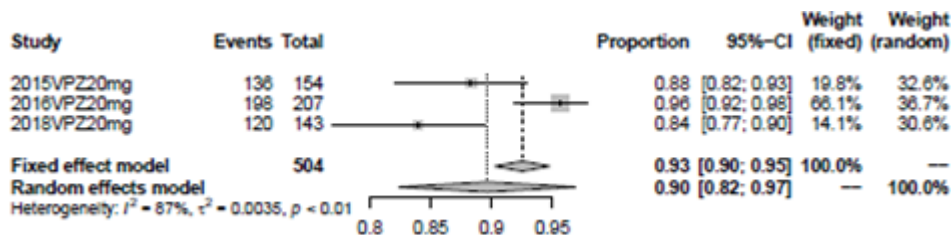

Figure S10 Meta-analysis results - Healing rate of VPZ at week 4 for all RE patients.

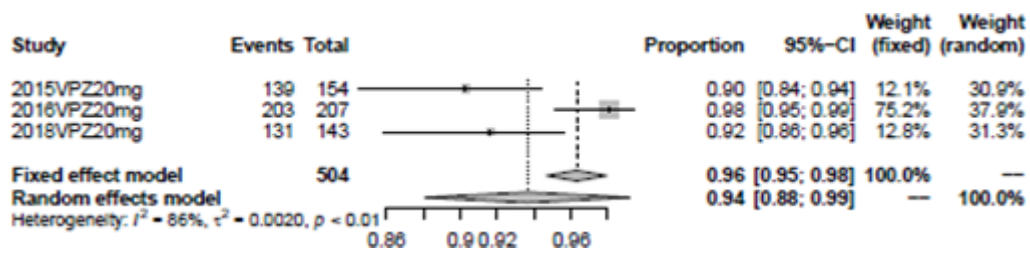

Figure S11 Meta-analysis results - Healing rate of VPZ at week 8 for all RE patients.

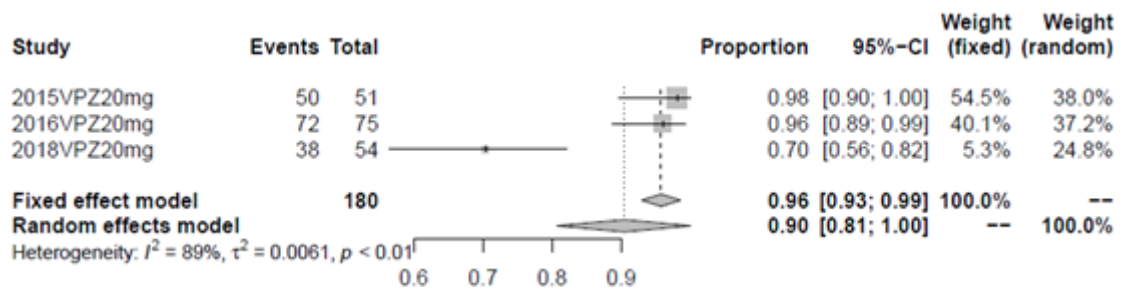

Figure S12 Meta-analysis results - Healing rate of VPZ at week 4 for moderate-to-severe patients.

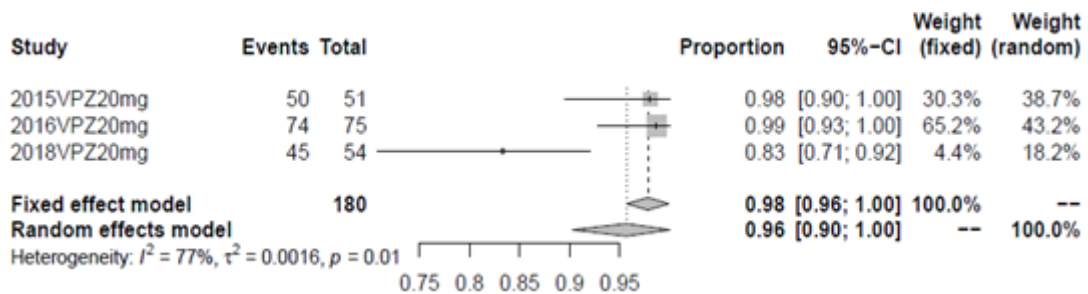

Figure S13 Meta-analysis results - Healing rate of VPZ at week 8 for moderate-to-severe patients.

## References

1. Corinaldesi R, Valentini M, Belâiche J, et al. Pantoprazole and omeprazole in the treatment of reflux oesophagitis: a European multicentre study. *Aliment Pharmacol Ther.* 1995 Dec;9(6):667-671.
2. Mössner J, Hölscher AH, Herz R, et al. A double-blind study of pantoprazole and omeprazole in the treatment of reflux oesophagitis: a multicentre trial. *Aliment Pharmacol Ther.* 1995 Jun;9(3):321-6.
3. Castell DO, Richter JE, Robinson M, et al. Efficacy and safety of lansoprazole in the treatment of erosive reflux esophagitis. The Lansoprazole Group. *Am J Gastroenterol.* 1996 Sep;91(9):1749-57.
4. Mee AS, Rowley JL, THE LANSOPRAZOLE CLINICAL RESEARCH GROUP. Rapid symptom relief in reflux oesophagitis: a comparison of lansoprazole and omeprazole. *Aliment Pharmacol Ther.* 1996 Oct;10(5):757-63.
5. Dekkers CP, Beker JA, Thjodleifsson B, et al. Double-blind, placebo-controlled comparison of rabeprazole 20 mg vs. omeprazole 20 mg in the treatment of erosive or ulcerative gastro-oesophageal reflux disease. *Aliment Pharmacol Ther.* 1999 Jan;13(1):49-57.
6. Delchier JC, Cohen G, Humphries TJ. Rabeprazole, 20 mg once daily or 10 mg twice daily, is equivalent to omeprazole, 20 mg once daily, in the healing of erosive gastroesophageal reflux disease. *Scand J Gastroenterol.* 2000 Dec;35(12):1245-50.
7. Kahrilas PJ, Falk GW, Johnson DA, et al. Esomeprazole improves healing and symptom resolution as compared with omeprazole in reflux oesophagitis patients: a randomized controlled trial. *Aliment Pharmacol Ther.* 2000 Oct;14(10):1249-58.
8. Richter JE. Oral Pantoprazole for Erosive Esophagitis: A Placebo-Controlled, Randomized Clinical Trial. 2000;95(11):10.
9. Dupas JL, Houcke P, Samoyeau R. Pantoprazole versus lansoprazole in French patients with reflux esophagitis. *Gastroenterol Clin Biol.* 2001 Mar;25(3):245-50.
10. Richter JE, Breiter JR, Levine JG. Efficacy and Safety of Esomeprazole Compared With Omeprazole in GERD Patients With Erosive Esophagitis: A Randomized Controlled Trial. 2001;96(3):10.
11. Castell DO, Johnson DA. Esomeprazole (40 mg) Compared With Lansoprazole (30 mg) in the Treatment of Erosive Esophagitis. 2002;97(3):9.
12. Howden CW, Ballard ED, Robieson W. Evidence for Therapeutic Equivalence of Lansoprazole 30mg and Esomeprazole 40mg in the Treatment of Erosive Oesophagitis: *Clin Drug Investig.* 2002;22(2):99-109.
13. Körner T, Schütze K, van Leendert RJM, et al. Comparable Efficacy of Pantoprazole and Omeprazole in Patients with Moderate to Severe Reflux Esophagitis. *Digestion.* 2003;67(1-2):6-13.
14. Gillissen A, Beil W, Modlin IM, et al. 40 mg Pantoprazole and 40 mg Esomeprazole Are Equivalent in the Healing of Esophageal Lesions and Relief from Gastroesophageal Reflux Disease-related Symptoms. *J Clin Gastroenterol.* 2004 Apr;38(4):332-40.
15. Pace F, Annese V, Prada A, et al. Rabeprazole is equivalent to omeprazole in the treatment of erosive gastro-oesophageal reflux disease. *Dig Liver Dis.* 2005 Oct;37(10):741-50.
16. Fennerty MB, Johanson JF, Hwang C, et al. Efficacy of esomeprazole 40 mg vs. lansoprazole 30 mg for healing moderate to severe erosive oesophagitis. *Aliment Pharmacol Ther.* 2005 Feb;21(4):455-63.
17. Labenz J, Armstrong D, Lauritsen K, et al. A randomized comparative study of esomeprazole 40 mg versus pantoprazole 40 mg for healing erosive oesophagitis: the EXPO study. *Aliment Pharmacol Ther.* 2005 Mar 15;21(6):739-46.
18. Lightdale CJ, Schmitt C, Hwang C, et al. A Multicenter, Randomized, Double-Blind, 8-Week Comparative Trial of Low-Dose Esomeprazole (20 mg) and Standard-Dose Omeprazole (20 mg) in Patients with Erosive Esophagitis. *Dig Dis Sci.* 2006 May;51(5):852-7.
19. Schmitt C, Lightdale CJ, Hwang C, et al. A Multicenter, Randomized, Double-Blind, 8-Week Comparative Trial of Standard Doses of Esomeprazole (40 mg) and Omeprazole (20 mg) for the Treatment of Erosive Esophagitis. *Dig Dis Sci.* 2006 May;51(5):844-50.
20. Vcev A, Begić I, Ostojić R, et al. Esomeprazole versus pantoprazole for healing erosive oesophagitis. *Coll Antropol.* 2006 Sep;30(3):519-22.
21. Bardhan KD, Achim A, Riddermann T, et al. A clinical trial comparing pantoprazole and esomeprazole to explore the concept of achieving 'complete remission' in gastro-oesophageal reflux disease: ACHIEVING 'COMPLETE REMISSION' IN GASTRO-OESOPHAGEAL REFLUX DISEASE. *Aliment Pharmacol Ther.* 2007 Apr 9;25(12):1461-9.
22. Sharma P, Shaheen NJ, Perez MC, et al. Clinical trials: healing of erosive oesophagitis with dexlansoprazole MR, a proton pump inhibitor with a novel dual delayed-release

- formulation - results from two randomized controlled studies. *Aliment Pharmacol Ther.* 2009 Apr;29(7):731–41.
23. Zheng RN. Comparative study of omeprazole, lansoprazole, pantoprazole and esomeprazole for symptom relief in patients with reflux esophagitis. *World J Gastroenterol WJG.* 2009 Feb 28;15(8):990–5.
  24. Ashida K, Sakurai Y, Nishimura A, et al. Randomised clinical trial: a dose-ranging study of vonoprazan, a novel potassium-competitive acid blocker, vs. lansoprazole for the treatment of erosive oesophagitis. *Aliment Pharmacol Ther.* 2015 Sep;42(6):685–95.
  25. Ashida K, Sakurai Y, Hori T, et al. Randomised clinical trial: vonoprazan, a novel potassium-competitive acid blocker, vs. lansoprazole for the healing of erosive oesophagitis. *Aliment Pharmacol Ther.* 2016 Jan;43(2):240–51.
  26. Chen MH, Dai N, Fei GJ, et al. A Phase 3, Randomized, Double-Blind, Multicenter Study to Evaluate the Efficacy and Safety of Vonoprazan 20 mg Once Daily Compared to Lansoprazole 30 mg Once Daily in Patients with Erosive Esophagitis: Results from a Chinese Cohort. 2018 United European Gastroenterology Week, October 20–24, Vienna, Austria. P1154.
  27. Bardhan KD, Hawkey CJ, Long RG, et al. Lansoprazole versus ranitidine for the treatment of reflux oesophagitis. UK Lansoprazole Clinical Research Group. *Aliment Pharmacol Ther.* 1995 Apr;9(2):145–51.
  28. Mulder CJ, Dekker W, Gerretsen M. Lansoprazole 30 mg versus omeprazole 40 mg in the treatment of reflux oesophagitis grade II, III and IVa (a Dutch multicentre trial). Dutch Study Group. *Eur J Gastroenterol Hepatol.* 1996 Nov 1;8(11):1101–6.
  29. Rensburg CV, Honiball PJ, Grundling HD, et al. Efficacy and tolerability of pantoprazole 40 mg versus 80 mg in patients with reflux oesophagitis. *Aliment Pharmacol Ther.* 1996;10(3):397–401.
  30. Jansen JB, Van Oene JC. Standard-dose lansoprazole is more effective than high-dose ranitidine in achieving endoscopic healing and symptom relief in patients with moderately severe reflux oesophagitis. The Dutch Lansoprazole Study Group. *Aliment Pharmacol Ther.* 1999 Dec;13(12):1611–20.
  31. Festen HP, Schenk E, Tan G, et al. Omeprazole versus high-dose ranitidine in mild gastroesophageal reflux disease: short- and long-term treatment. The Dutch Reflux Study Group. *Am J Gastroenterol.* 1999 Apr;94(4):931–6.
  32. Farley A, Wruble LD, Humphries TJ. Rabeprazole versus ranitidine for the treatment of erosive gastroesophageal reflux disease: a double-blind, randomized clinical trial. Rabeprazole Study Group. *Am J Gastroenterol.* 2000 Aug;95(8):1894–9.
  33. Kovacs TOG, Wilcox CM, Devault K, et al. Comparison of the efficacy of pantoprazole vs. nizatidine in the treatment of erosive oesophagitis: a randomized, active-controlled, double-blind study. *Aliment Pharmacol Ther.* 2002;16(12):2043–52.
  34. Kawano S, Murata H, Tsuji S, et al. Randomized comparative study of omeprazole and famotidine in reflux esophagitis. *J Gastroenterol Hepatol.* 2002;17(9):955–9.
  35. Meneghelli UG, Boaventura S, Moraes-Filho JPP, et al. Efficacy and tolerability of pantoprazole versus ranitidine in the treatment of reflux esophagitis and the influence of *Helicobacter pylori* infection on healing rate. *Dis Esophagus Off J Int Soc Dis Esophagus.* 2002;
  36. Cho YK, Choi M-G, Bak Y-T, et al. Efficacy of S-Pantoprazole 20 mg Compared with Pantoprazole 40 mg in the Treatment of Reflux Esophagitis: A Randomized, Double-Blind Comparative Trial. *Dig Dis Sci.* 2012 Dec 1;57(12):3189–94.
  37. Song F, He H, Shen L, et al. Efficacy and Safety of ilaprazole in the treatment of 180 patients with reflux esophagitis. *Chin J New Drugs.* 2012(21(8):905–7.
  38. Xue Y, Qin X, Zhou L, et al. A Randomized, Double-blind, Active-Controlled, Multi-center Study of Ilaprazole in the Treatment of Reflux Esophagitis. *Clin Drug Investig.* 2016 Dec;36(12):985–92.
  39. Ashida K, Iwakiri K, Hiramatsu N, et al. Maintenance for healed erosive esophagitis: Phase III comparison of vonoprazan with lansoprazole. *World J Gastroenterol.* 2018 Apr 14;24(14):1550–61.
  40. Bate CM, Booth SN, Crowe JP, et al. Omeprazole 10 mg or 20 mg once daily in the prevention of recurrence of reflux oesophagitis. Solo Investigator Group. *Gut.* 1995 Apr;36(4):492–8.
  41. DeVault KR, Johanson JF, Johnson DA, et al. Maintenance of Healed Erosive Esophagitis: A Randomized Six-Month Comparison of Esomeprazole Twenty Milligrams With Lansoprazole Fifteen Milligrams. *Clin Gastroenterol Hepatol.* 2006 Jul;4(7):852–9.
  42. Robinson M, Lanza F, Avner D, et al. Effective maintenance treatment of reflux esophagitis with low-dose lansoprazole. A randomized, double-blind, placebo-controlled trial. *Ann Intern Med.* 1996 May 15;124(10):859–67.
  43. Labenz J, Armstrong D, Lauritsen K, et al. Esomeprazole 20 mg vs. pantoprazole 20 mg for maintenance therapy

- of healed erosive oesophagitis: results from the EXPO study1. *Aliment Pharmacol Ther.* 2005 Nov;22(9):803–11.
44. Lauritsen K, Deviere J, Bigard M-A, et al. Esomeprazole 20 mg and lansoprazole 15 mg in maintaining healed reflux oesophagitis: Metropole study results. *Aliment Pharmacol Ther.* 2003 Feb;17(3):333–41.
  45. Richter JE, Fraga P, Mack M, et al. Prevention of erosive oesophagitis relapse with pantoprazole. *Aliment Pharmacol Ther.* 2004 Sep 1;20(5):567–75.
  46. Vakil NB, Shaker R, Johnson DA, et al. The new proton pump inhibitor esomeprazole is effective as a maintenance therapy in GERD patients with healed erosive oesophagitis: a 6-month, randomized, double-blind, placebo-controlled study of efficacy and safety. *Aliment Pharmacol Ther.* 2001 Jul;15(7):927–35.
  47. Metz DC, Bochenek WJ. Pantoprazole maintenance therapy prevents relapse of erosive oesophagitis. *Aliment Pharmacol Ther.* 2003;17(1):155–64.
  48. Gough AL, Long RG, Cooper BT, et al. Lansoprazole versus ranitidine in the maintenance treatment of reflux oesophagitis. *Aliment Pharmacol Ther.* 1996;10(4):529–39.
  49. Kovacs TO, Freston JW, Haber MM, et al. Long-Term Efficacy of Lansoprazole in Preventing Relapse of Erosive Reflux Esophagitis. *Dig Dis Sci.* 2009 Mar 7;54(8):1693.
  50. Escourrou J, Deprez P, Saggiaro A, et al. Maintenance therapy with pantoprazole 20 mg prevents relapse of reflux oesophagitis. *Aliment Pharmacol Ther.* 1999 Nov;13(11):1481–91.
  51. Plein K, Hotz J, Wurzer H, et al. Pantoprazole 20 mg is an effective maintenance therapy for patients with gastro-oesophageal reflux disease. *Eur J Gastroenterol Hepatol.* 2000 Apr;12(4):425–32.
  52. Johnson DA, Benjamin SB, Vakil NB, et al. Esomeprazole once daily for 6 months is effective therapy for maintaining healed erosive esophagitis and for controlling gastroesophageal reflux disease symptoms: a randomized, double-blind, placebo-controlled study of efficacy and safety. *Am J Gastroenterol.* 2001 Jan;96(1):27–34.
  53. Goh K-L, Benamouzig R, Sander P, et al. Efficacy of pantoprazole 20mg daily compared with esomeprazole 20mg daily in the maintenance of healed gastroesophageal reflux disease: a randomized, double-blind comparative trial –the EMANCIPATE study: *Eur J Gastroenterol Hepatol.* 2007 Mar;19(3):205–11.
  54. Caos A, Moskovitz M, Dayal Y, et al. Rabeprazole for the prevention of pathologic and symptomatic relapse of erosive or ulcerative gastroesophageal reflux disease. Rabeprazole Study Group. *Am J Gastroenterol.* 2000 Nov 1;95(11):3081–8.
  55. Birbara C, Breiter J, Perdomo C, et al. Rabeprazole for the prevention of recurrent erosive or ulcerative gastro-oesophageal reflux disease. Rabeprazole Study Group. *Eur J Gastroenterol Hepatol.* 2000 Aug;12(8):889–97.
  56. Bardhan KD, Cherian P, Vaishnavi A, et al. Erosive oesophagitis: outcome of repeated long term maintenance treatment with low dose omeprazole 10 mg or placebo. *Gut.* 1998 Oct;43(4):458–64.
